# Supplementary material for: Feasibility and safety of targeted focal microwave ablation of the index tumor in patients with low to intermediate risk prostate cancer: Results of the FOSTINE trial
Source: PubMed Central journal article supplement (PMC8279354; doi:10.1371/journal.pone.0252040), 2021-07-14

Paris le 01<sup>er</sup> avril 2021

Direction de la  
Recherche  
Clinique et de  
l'Innovation (DRCI)

Carré Historique de  
l'Hôpital Saint-Louis  
Secteur Gris - Porte 23  
1 avenue Claude Vellefaux  
75475 PARIS  
[http://recherche-  
innovation.aphp.fr/](http://recherche-innovation.aphp.fr/)

Directrice  
**Stéphanie  
DECOOPMAN**

I, Stéphanie Decoopman, the undersigned Director of the Clinical Research and Innovation of AP-HP, and sponsor representative of the FOSTINE trial, agrees that the research protocol should be published under a CC-BY license.

Stéphanie Decoopman  
Directrice de la DRCI

Erik DOMAIN  
DRCI - AP-HP  
Directeur adjoint,



Supplement: pone.0252040.s003.pdf [file pone.0252040.s003.pdf]
